# Supplementary material for: Adipocytes promote breast cancer resistance to chemotherapy, a process amplified by obesity: role of the major vault protein (MVP)
Source: PubMed Central journal article supplement (PMC6337862; doi:10.1186/s13058-018-1088-6), 2019-01-17
Supplement: 13058_2018_1088_MOESM2_ESM.pdf [file 13058_2018_1088_MOESM2_ESM.pdf]

**Table S1. Clinical characteristics of the breast cancer patients and histopathological characteristics of the breast tumors**

| Characteristics                                    | Total<br>(n=34) <sup>a</sup> | BMI                                          |                                              | P-value          |
|----------------------------------------------------|------------------------------|----------------------------------------------|----------------------------------------------|------------------|
|                                                    |                              | <25 kg/m <sup>2</sup><br>(n=15) <sup>a</sup> | ≥25 kg/m <sup>2</sup><br>(n=19) <sup>a</sup> |                  |
| Age at diagnosis, years                            | 58.5 (35-74)                 | 52 (35-74)                                   | 60 (37-72)                                   | <b>0.041</b>     |
| BMI, kg/m <sup>2</sup>                             | 26.0 (20.0-46.1)             | 22.1 (20.0-24.8)                             | 33.8 (25.4-46.1)                             | <b>&lt;0.001</b> |
| <b>Comorbidities</b>                               |                              |                                              |                                              |                  |
| Diabetes, %                                        |                              |                                              |                                              | 0.053            |
| No                                                 | 29 (85.3)                    | 15 (100.0)                                   | 14 (73.7)                                    |                  |
| Yes                                                | 5 (14.7)                     | 0 (0.0)                                      | 5 (26.3)                                     |                  |
| Hypertension, %                                    |                              |                                              |                                              | <b>0.005</b>     |
| No                                                 | 26 (76.5)                    | 15 (100.0)                                   | 11 (57.9)                                    |                  |
| Yes                                                | 8 (23.5)                     | 0 (0.0)                                      | 8 (42.1)                                     |                  |
| Hypercholesterolemia, %                            |                              |                                              |                                              | 0.113            |
| No                                                 | 30 (88.2)                    | 15 (100.0)                                   | 15 (78.9)                                    |                  |
| Yes                                                | 4 (11.8)                     | 0 (0.0)                                      | 4 (21.1)                                     |                  |
| <b>Surgical treatment</b>                          |                              |                                              |                                              |                  |
| Conservative surgery, %                            | 19 (55.9)                    | 7 (46.7)                                     | 12 (63.2)                                    | 0.336            |
| Mastectomy, %                                      | 15 (44.1)                    | 8 (53.3)                                     | 7 (36.8)                                     |                  |
| Sentinel lymph node                                | 20 (58.8)                    | 9 (60.0)                                     | 11 (57.9)                                    | 0.717            |
| Axillary lymphadenectomy                           | 13 (38.2)                    | 5 (33.3)                                     | 8 (42.1)                                     |                  |
| <b>Breast tumor and lymph node characteristics</b> |                              |                                              |                                              |                  |
| Invasive ductal carcinoma, %                       | 32 (94.1)                    | 15 (100.0)                                   | 17 (89.5)                                    | 0.492            |
| Invasive lobular carcinoma, %                      | 2 (5.9)                      | 0 (0.0)                                      | 2 (10.5)                                     |                  |
| Tumor diameter, mm                                 | 17.0 (7.0-65.0)              | 17.0 (10.0-35.0)                             | 18.0 (7.0-65.0)                              | 0.742            |
| Grade, %                                           |                              |                                              |                                              | 0.578            |
| 1                                                  | 3 (8.8)                      | 1 (6.7)                                      | 2 (10.5)                                     |                  |
| 2                                                  | 21 (61.8)                    | 8 (53.3)                                     | 13 (68.4)                                    |                  |
| 3                                                  | 10 (29.4)                    | 6 (40.0)                                     | 4 (21.1)                                     |                  |
| Ki67 hotspot, (n=23), %                            | 20 (5-30)                    | 20 (5-25)                                    | 17.5 (5-30)                                  | 0.682            |
| Hormone receptor positive, %                       | 30 (88.2)                    | 13 (86.7)                                    | 17 (89.5)                                    | 1.000            |
| HER2 positive, %                                   | 6 (17.6)                     | 3 (20.0)                                     | 3 (15.8)                                     | 1.000            |
| Lymph node                                         |                              |                                              |                                              | <b>0.002</b>     |
| N0                                                 | 17 (50.0)                    | 12 (80.0)                                    | 5 (26.3)                                     |                  |
| N+                                                 | 17 (50.0)                    | 3 (20.0)                                     | 14 (73.7)                                    |                  |
| <b>MVP analysis</b>                                |                              |                                              |                                              |                  |
| Ratio Front/Center (n=33)                          |                              |                                              |                                              | 0.459            |
| >1, %                                              | 22 (66.7)                    | 8 (57.1)                                     | 14 (73.7)                                    |                  |
| <1, %                                              | 11 (33.3)                    | 6 (42.9)                                     | 5 (26.3)                                     |                  |
| Median ratio > 1 (n=22)                            | 1.53 (1.01-9.27)             | 1.44 (1.01-9.27)                             | 1.58 (1.01-5.73)                             | 0.838            |

The data are presented for the overall cohort and stratified by BMI; presented as median (range) or n (%).

<sup>a</sup>Number of patients may vary due to missing information

Abbreviations: BMI, body mass index (kg/m<sup>2</sup>); Hormone receptor (estrogen receptor positive when ≥ 10% and progesterone receptor positive when ≥ 10%); HER2, human epidermal growth factor receptor 2; MVP: Major Vault Protein.
