# Supplementary material for: Adipocytes promote breast cancer resistance to chemotherapy, a process amplified by obesity: role of the major vault protein (MVP)
Source: PubMed Central journal article supplement (PMC6337862; doi:10.1186/s13058-018-1088-6), 2019-01-17
Supplement: 13058_2018_1088_MOESM8_ESM.pdf [file 13058_2018_1088_MOESM8_ESM.pdf]

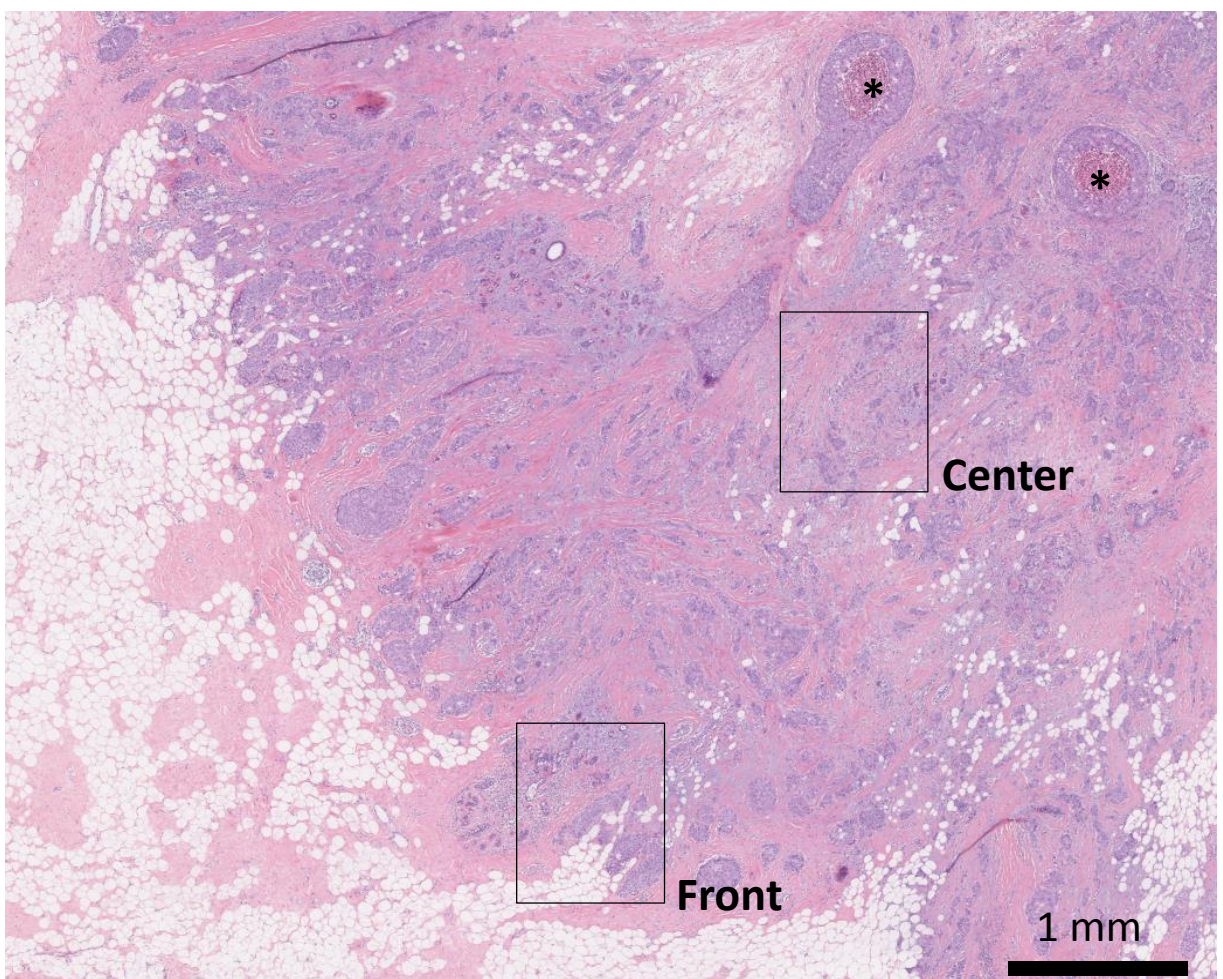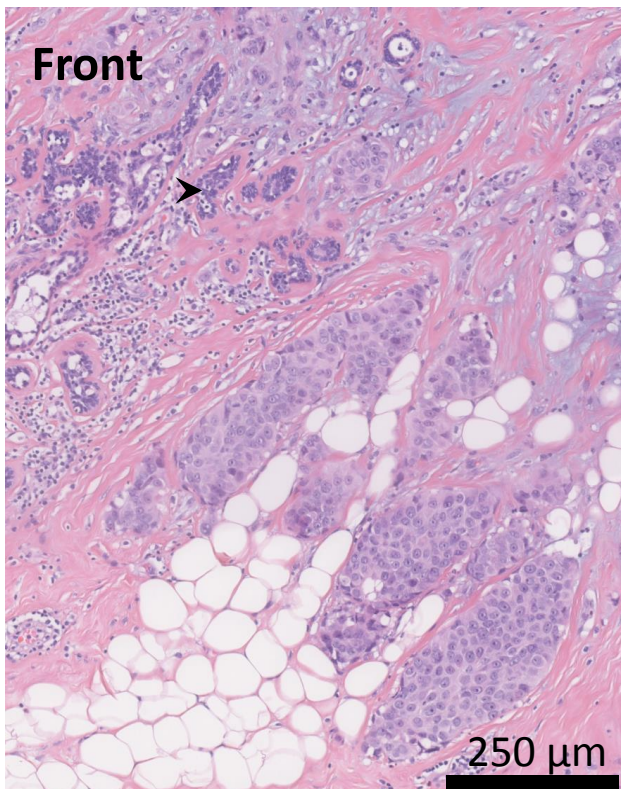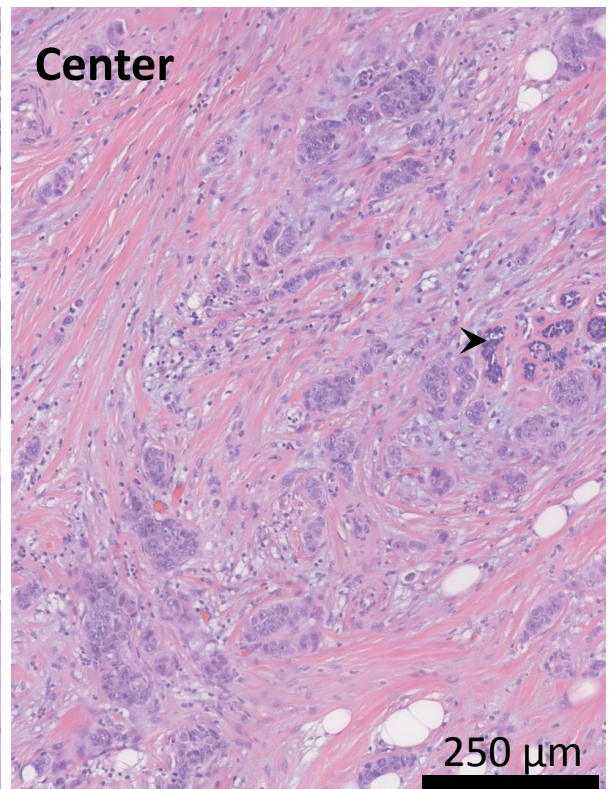

**Figure S6.** Hematoxylin/eosin staining of the tumor used to represent MVP expression (Fig. 5e). (Front) zoom of the invasive front in representative area; (Center) zoom of the center of the tumor in representative area. In situ carcinoma (black stars) and normal mammary glands (arrowheads) are considered as positive and negative internal controls respectively.
