# Supplementary material for: Adipocytes promote breast cancer resistance to chemotherapy, a process amplified by obesity: role of the major vault protein (MVP)
Source: Springer Nature journal article supplement (doi:10.1186/s13058-018-1088-6), 2019-01-17
Supplement: MOESM4 [file 16403248]

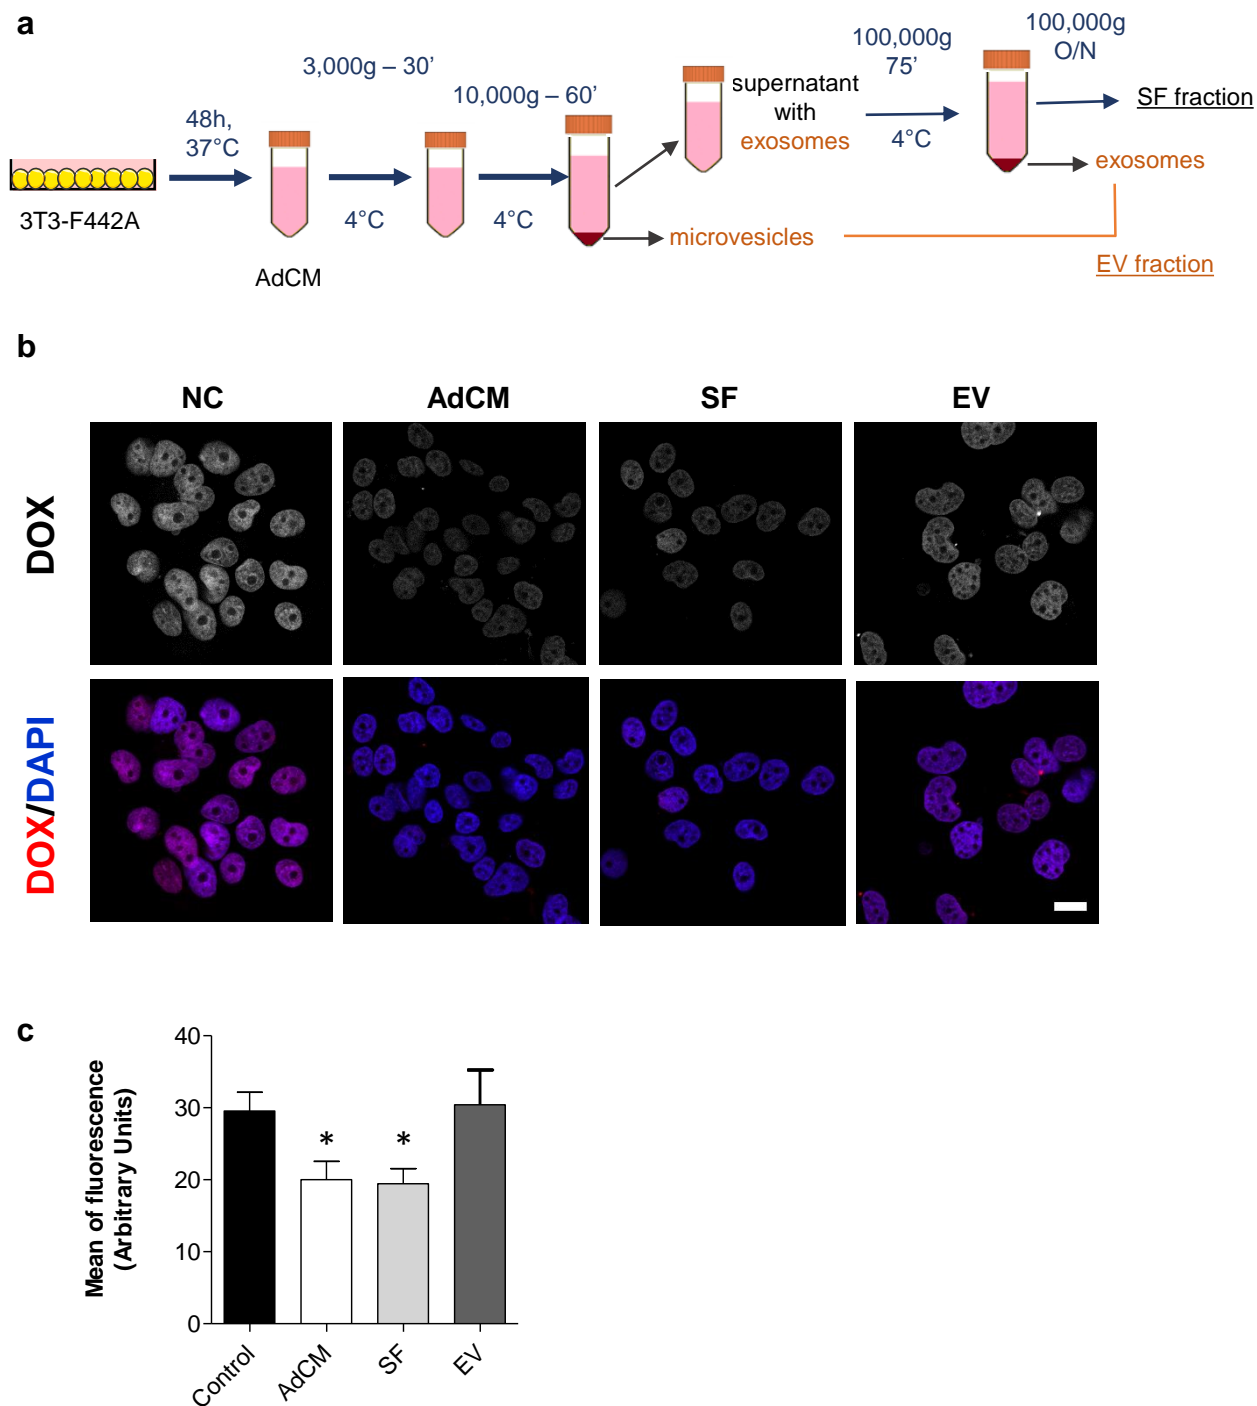

**Figure S2.** Adipocyte soluble factors reproduce the effect of AdCM on subcellular redistribution of DOX in tumor cells. **a** Experimental protocol used to obtain soluble factors (SF) and extracellular vesicles (EV) fractions: the conditioned medium of 3T3-F442A adipocytes (AdCM) was prepared by incubating cells in ultracentrifuged DMEM medium supplemented with 10% SVF for 48h. The obtained medium was first centrifuged at 3,000 g for 30 min to remove debris and apoptotic bodies. To separate vesicles (indicated in orange in the figure), AdCM was then centrifuged for 60 minutes at 10,000g (to pellet microvesicles) and 75 minutes at 100,000g (to pellet exosomes). After an additional centrifugation (100,000g overnight (O/N)), the vesicle-depleted supernatant therefore contains only SF. Microvesicles and exosomes successively pelleted by centrifugation were resuspended in ultracentrifugated DMEM (EV fraction). SF and EV were kept at  $-80^{\circ}\text{C}$  until use. **b** Intracellular localization of DOX visualized by confocal microscopy in noncocultivated (NC) MDA-MB436 cells or treated with AdCM or the different indicated fractions for 24h after DOX exposure (scale bars, 20  $\mu\text{m}$ ). **c** Corresponding quantification of fluorescence intensity (DOX) in the nuclei.
